# Supplementary material
Source: PubMed Central journal article supplement (PMC6482082)
Supplement: NIHMS1521538-supplement-Major_Resource_Table.pdf [file NIHMS1521538-supplement-Major_Resource_Table.pdf]

## Major Resources Tables

### Animals

| Species/Strain                                                                                    | Vendor or Source    | Background Strain | Catalog # | Sex             |
|---------------------------------------------------------------------------------------------------|---------------------|-------------------|-----------|-----------------|
| ApoE <sup>-/-</sup>                                                                               | Jackson Labs        | C57BL/6           | 002052    | Male and female |
| Rosa26 <sup>Rainbow/+</sup>                                                                       | Stanford University | C57BL/6           |           | Female          |
| Myh11-Cre <sup>ERT2</sup><br>B6.FVB-Tg(Myh11-cre/ERT2)1Soff/J                                     | Jackson Labs        | C57BL/6           | 019079    | Male            |
| Rosa26 <sup>tdTomato/tdTomato</sup><br>B6.Cg-<br>Gt(ROSA)26Sor <sup>tm14(CAG-tdTomato)Hze/J</sup> | Jackson Labs        | C57BL/6           | 007914    | Female          |

### Antibodies

| Target antigen                      | Vendor or Source | Catalog # | Working concentration | Lot # (preferred but not required) |
|-------------------------------------|------------------|-----------|-----------------------|------------------------------------|
| SM $\alpha$ -actin                  | Abcam            | ab5694    | 1 $\mu$ g/ml          |                                    |
| CD45                                | BD Pharmingen    | 550539    | 0.6 $\mu$ g/ml        |                                    |
| BV421 rat anti-mouse CD45           | BD Pharmingen    | 563890    | 2 $\mu$ g/ml          |                                    |
| BV500 rat anti-mouse I-A/I-E        | BD Pharmingen    | 562366    | 2 $\mu$ g/ml          |                                    |
| Alexa Fluor647 rat anti-mouse ABCA1 | AbD Serotec      | MCA2681   | 10 $\mu$ g/ml         |                                    |

### Cultured Cells

| Name                             | Vendor or Source | Sex (F, M, or unknown) |
|----------------------------------|------------------|------------------------|
| Mouse aortic smooth muscle cells | Balb/c mice      | Male                   |
| RAW264.7                         | ATCC             | Male                   |

### Reagents

| Name     | Vendor or Source            | Catalog# |
|----------|-----------------------------|----------|
| 8Br-cAMP | Sigma                       | B788     |
| apoA-I   | Academy Bio-Medical Company | 11P-105  |
